# Supplementary material for: Complete Genome Sequence of ER2796, a DNA Methyltransferase-Deficient Strain of Escherichia coli K-12
Source: PubMed Central journal article supplement (PMC4444293; doi:10.1371/journal.pone.0127446), 2015-05-26

**Figure S1**

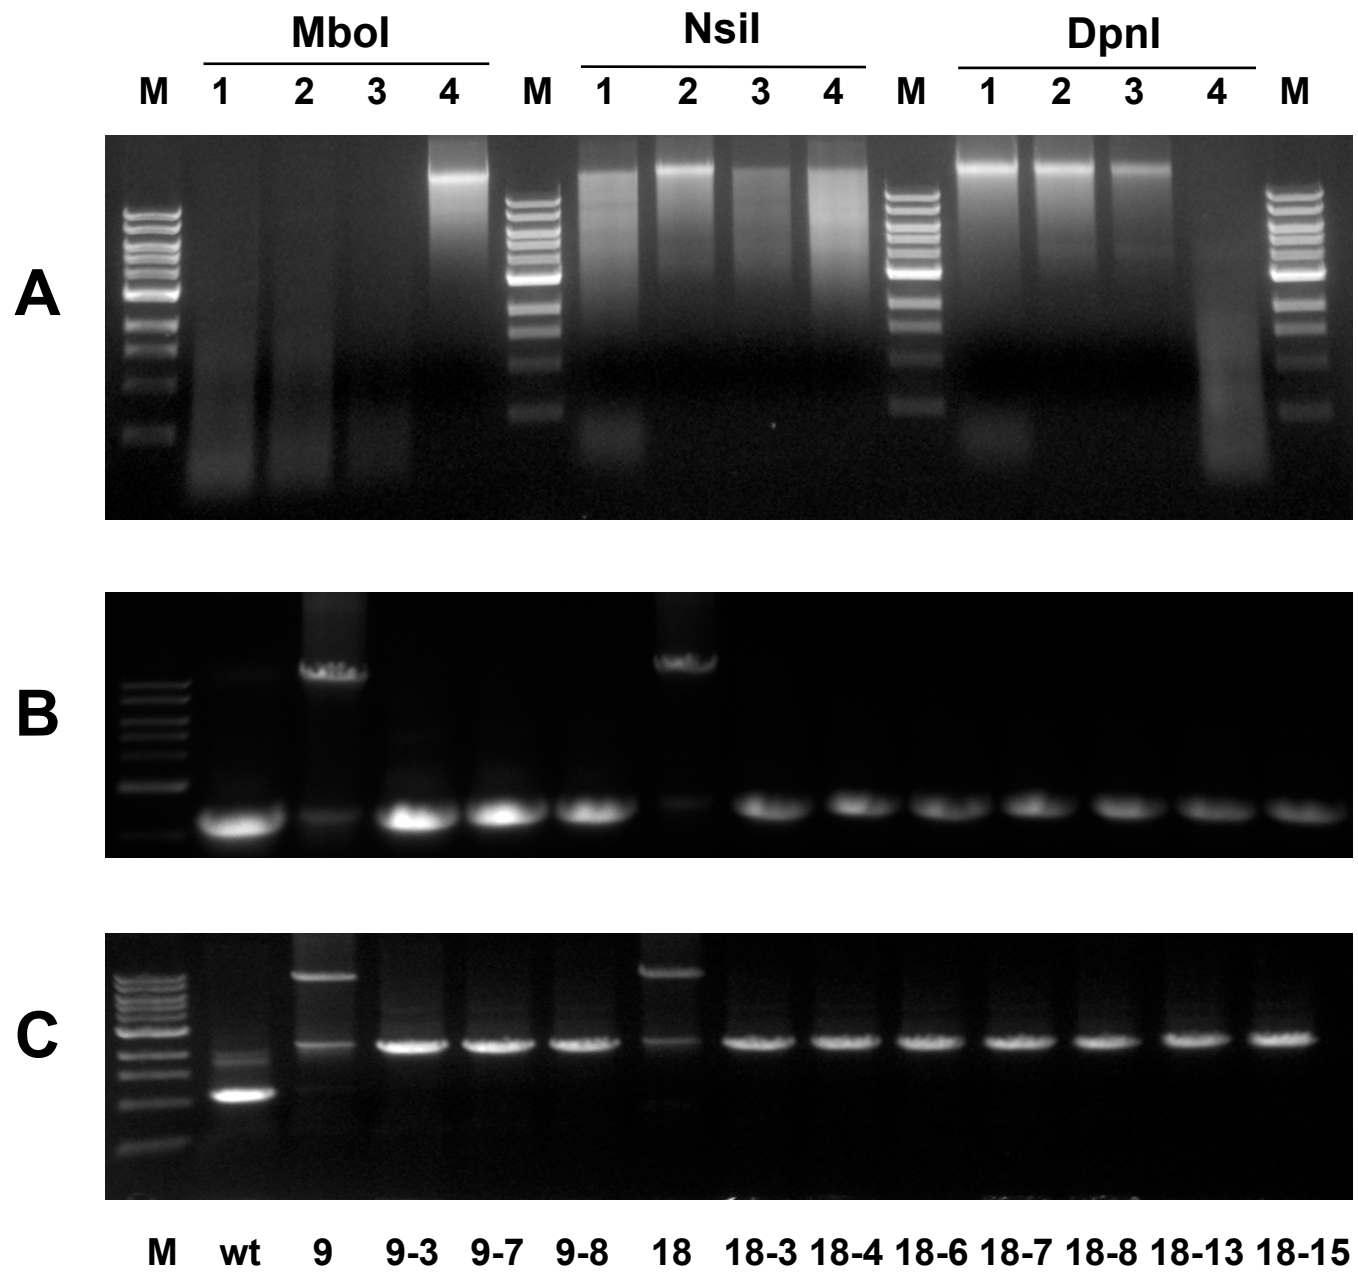

Supplement: pone.0127446.s001.pdf [file pone.0127446.s001.pdf]
