# Supplementary material for: Complete Genome Sequence of ER2796, a DNA Methyltransferase-Deficient Strain of Escherichia coli K-12
Source: PubMed Central journal article supplement (PMC4444293; doi:10.1371/journal.pone.0127446), 2015-05-26
Supplement: pone.0127446.s002.pdf [file pone.0127446.s002.pdf]

**Table S1A. List of sequence changes from the reference strain MG1655 to ER2796 (insertions and deletions).**

| Type          | MG1655              | ER2796              | Length (bp) | Description or Consequence                                     | Footnotes |
|---------------|---------------------|---------------------|-------------|----------------------------------------------------------------|-----------|
| insertion     | bet 167919-167920   | 167920-169255       | 1336        | fhuA::IS2                                                      |           |
| insertion     | bet 317993-317994   | 319330-320667       | 1338        | rclA::IS10                                                     |           |
| deletion      | 362419-364862       | bet 365092-365093   | 2444        | lacZ $\Delta$ 223-1024, adds 40 aa extension overlapping lacY  |           |
| deletion      | 379237-379237       | bet 379466-379467   | 1           | intergenic fs, between frmR-yaiO                               | a         |
| insertion     | bet 547831-547832   | 548061-548061       | 1           | ylbE +1 fs                                                     | b         |
| deletion      | 575013-578410       | bet 575242-575243   | 3398        | DLP12 prophage deletion (nmpC-borD)                            |           |
| insertion     | bet 580216-580217   | 577049-577825       | 777         | nohD::IS1                                                      |           |
| deletion      | 872620-872620       | bet 870228-870229   | 1           | yliE -1 fs                                                     |           |
| insertion     | bet 1096728-1096729 | 1094337-1094517     | 181         | intergenic fs, between ycdU-serX                               |           |
| deletion      | 1195598-1210801     | bet 1193386-1193387 | 15204       | e14 prophage deletion (ymfD-mcrA)                              |           |
| deletion      | 1286098-1286275     | bet 1268682-1268683 | 178         | intergenic deletion, between narI-rttR                         |           |
| deletion      | 1341944-1341944     | bet 1324350-1324351 | 1           | yciT -1 fs                                                     |           |
| deletion      | 1423350-1423350     | bet 1405755-1405756 | 1           | intergenic fs, between trkG-ynaK (rac prophage)                |           |
| deletion      | 1553754-1553754     | bet 1536158-1536159 | 1           | intergenic fs, between maeA-sra                                |           |
| insertion     | bet 1635044-1635045 | 1617449-1618786     | 1338        | IS10 in intergenic ynfO-ydfO                                   |           |
| deletion      | 1791400-1791400     | bet 1775141-1775142 | 1           | btuD -1 fs                                                     |           |
| deletion      | 1976527-1977302     | bet 1960267-1960268 | 776         | loss of IS1H from flhD operon [Barker et al 2004, J Bacteriol] |           |
| insertion     | bet 2038764-2038765 | 2021730-2030885     | 9156        | yedZ::Tn10                                                     |           |
| deletion      | 2088669-2088704     | bet 2080789-2080790 | 36          | hisG $\Delta$ 152-163, in-frame deletion                       |           |
| deletion      | 2109280-2109280     | bet 2102364-2102365 | 1           | rfbD -1 fs                                                     |           |
| insertion     | bet 2235901-2235902 | 2227986-2228762     | 777         | mgIA::IS1                                                      |           |
| deletion      | 2358572-2358572     | bet 2351432-2351433 | 1           | rhmD -1 fs                                                     |           |
| insertion     | bet 2471415-2471416 | 2464276-2464276     | 1           | oweS (pseudogene) +1 fs                                        |           |
| deletion      | 2556719-2563508     | bet 2549579-2549580 | 6790        | CPZ-55 prophage deletion                                       |           |
| insertion     | bet 2763433-2763434 | 2749505-2749512     | 8           | intergenic insertion, between yfjL-yfjM (CP4-57 prophage)      | a         |
| deletion      | 2812480-2812480     | 2798558-2798559     | 1           | luxS -1 fs                                                     |           |
| deletion      | 3205570-3205570     | 3191647-3191648     | 1           | ttdB -1 fs                                                     |           |
| insertion     | bet 3260834-3260835 | 3246953-3248151     | 1199        | tdcD::IS5                                                      |           |
| deletion      | 3317285-3317285     | bet 3304560-3304561 | 1           | argG -1 fs                                                     |           |
| deletion      | 3347229-3363578     | bet 3334503-3334504 | 16350       | $\Delta$ (mtgA-yhcE), promoted by IS5R                         |           |
| net insertion | 3513241-3513773     | 3484166-3485431     | 733         | dam $\Delta$ 55-242, 533 bp deletion, 1266 bp insertion (KanR) |           |
| insertion     | bet 3694452-3694453 | 3666111-3667309     | 1199        | IS5 in intergenic yhjR-bcsE                                    |           |

|              |                     |                     |                                                                      |   |
|--------------|---------------------|---------------------|----------------------------------------------------------------------|---|
| insertion    | bet 3729451-3729452 | 3702309-3703085     | 777 xylF::IS1                                                        |   |
| deletion     | 3771063-3771064     | bet 3744696-3744697 | 2 mtIA -2 fs                                                         |   |
| insertion    | bet 3813902-3813903 | 3787535-3787535     | 1 rph +1 fs                                                          |   |
| deletion     | 4126834-4126835     | bet 4100466-4100467 | 2 metB -2 fs                                                         |   |
| net deletion | 4166289-4166394     | 4139920-4139939     | 86 intergenic 106 bp deletion, 20 bp insertion, between rrsB-gltT    | c |
| deletion     | 4169461-4169462     | bet 4143005-4143006 | 2 rrIB (rRNA) 2 nt deletion                                          |   |
| insertion    | bet 4233537-4233538 | 4207081-4207857     | 777 IS1 in intergenic pgi-yjbE                                       |   |
| deletion     | 4294293-4294403     | bet 4268612-4268613 | 111 intergenic deletion in RIP321 repeat region                      |   |
| net deletion | 4537567-4595455     | 4511776-4514442     | 55222 Δ(fimB-opgB)::IS10+IS10; 57,889 bp deletion, 2667 bp insertion |   |
| insertion    | bet 4604109-4604110 | 4523097-4523097     | 1 leuV (tRNA) 1 nt insertion                                         | a |

### Footnotes

- a Not in ER3413
- b Not a real change; sequence error in MG1655 file NC\_000913.2, corrected in NC\_000913.3; ylbE not listed in Table S4 for this reason
- c From the same gene conversion event responsible for the block of changes at MG1655 4164671-4166499 in the SNP table

**Table S1B. List of sequence changes from the reference strain MG1655 to ER2796 (SNPs and substitutions).**

| Type               | MG1655        | ER2796        | Change        | Gene  | Locus | Codon Change | Type        | AA Change | ER2796 ORF | Footnotes       |
|--------------------|---------------|---------------|---------------|-------|-------|--------------|-------------|-----------|------------|-----------------|
| SNP (transition)   |               | 10,581        | 10581 C -> T  | –     | –     | –            | INTERGENIC  | –         | –          |                 |
| SNP (transition)   |               | 20,756        | 20756 G -> A  | –     | –     | –            | INTERGENIC  | –         | –          |                 |
| SNP (transition)   |               | 21,047        | 21047 G -> A  | rpsT  | b0023 | GCC -> GTC   | MISSSENSE   | A11V      | ER2796_18  |                 |
| SNP (transition)   |               | 23,918        | 23918 G -> A  | ileS  | b0026 | GAT -> AAT   | MISSSENSE   | D510N     | ER2796_20  |                 |
| SNP (transition)   |               | 32,355        | 32355 C -> T  | carB  | b0033 | ATC -> ATT   | SILENT      | I513      | ER2796_28  |                 |
| SNP (transition)   |               | 73,439        | 73439 C -> T  | thiP  | b0067 | GCG -> GCA   | SILENT      | A361      | ER2796_62  |                 |
| SNP (transition)   |               | 94,278        | 94278 G -> A  | murE  | b0085 | GCG -> GCA   | SILENT      | A371      | ER2796_82  | a               |
| SNP (transversion) |               | 134,256       | 134256 G -> T | –     | –     | –            | INTERGENIC  | –         | –          | b               |
| SNP (transition)   |               | 156,068       | 156068 A -> G | ecpD  | b0140 | GTA -> GCA   | MISSSENSE   | V45A      | ER2796_137 |                 |
| SNP (transition)   |               | 157,043       | 157043 G -> A | –     | –     | –            | INTERGENIC  | –         | –          |                 |
| SNP (transition)   |               | 244,459       | 245795 G -> A | yafJ  | b0223 | GGC -> AGC   | MISSSENSE   | G45S      | ER2796_228 |                 |
| SNP (transversion) |               | 283,759       | 285095 T -> G | yagF  | b0269 | GCT -> GCG   | SILENT      | A445      | ER2796_275 | a               |
| SNP (transition)   |               | 286,580       | 287916 C -> T | yagH  | b0271 | CTG -> TTG   | SILENT      | L190      | ER2796_277 |                 |
| SNP (transition)   |               | 288,315       | 289651 A -> G | yagI  | b0272 | CTT -> CTC   | SILENT      | L24       | ER2796_278 |                 |
| Substitution       | 305436-305437 | 306772-306773 | GG -> AA      | ecpD  | b0290 | TCC -> TTT   | MISSSENSE   | S202F     | ER2796_297 |                 |
| SNP (transition)   |               | 314,745       | 316081 G -> A | insE1 | b0298 | CTG -> CTA   | SILENT      | L77       | ER2796_305 |                 |
| SNP (transition)   |               | 321,288       | 323962 C -> T | ykgE  | b0306 | CTG -> TTG   | SILENT      | L153      | ER2796_314 |                 |
| SNP (transition)   |               | 360,258       | 362932 G -> A | cynX  | b0341 | GGC -> GAC   | MISSSENSE   | G348D     | ER2796_349 |                 |
| SNP (transition)   |               | 457,412       | 457641 G -> A | clpX  | b0438 | GAT -> AAT   | MISSSENSE   | D255N     | ER2796_448 |                 |
| SNP (transition)   |               | 458,656       | 458885 C -> T | lon   | b0439 | TCT -> TTT   | MISSSENSE   | S182F     | ER2796_449 |                 |
| SNP (transversion) |               | 461,618       | 461847 C -> A | ppiD  | b0441 | CTC -> CTA   | SILENT      | L160      | ER2796_451 |                 |
| SNP (transition)   |               | 536,755       | 536984 C -> T | –     | –     | –            | INTERGENIC  | –         | –          |                 |
| SNP (transition)   |               | 542,487       | 542716 A -> G | ylbA  | b0515 | TAA -> CAA   | READTHROUGH | stop262Q  | ER2796_524 | Adds aa 262-267 |
| SNP (transversion) |               | 542,488       | 542717 A -> T | ylbA  | b0515 | ATT -> ATA   | SILENT      | I261      | ER2796_524 |                 |
| SNP (transition)   |               | 547,694       | 547923 A -> G | ylbE  | b4572 | GAA -> GAG   | SILENT      | E38       | ER2796_528 |                 |
| SNP (transition)   |               | 627,792       | 625401 A -> G | entA  | b0596 | AAT -> GAT   | MISSSENSE   | N7D       | ER2796_607 |                 |
| SNP (transition)   |               | 658,740       | 656349 G -> A | lipA  | b0628 | CTG -> TTG   | SILENT      | L234      | ER2796_642 |                 |
| SNP (transversion) |               | 658,750       | 656359 G -> T | lipA  | b0628 | ACC -> ACA   | SILENT      | T230      | ER2796_642 |                 |
| SNP (transition)   |               | 661,214       | 658823 G -> A | lipB  | b0630 | CTC -> CTT   | SILENT      | L96       | ER2796_644 |                 |
| SNP (transition)   |               | 695,693       | 693302 C -> T | glnX  | b0664 | –            | tRNA        | –         | –          |                 |
| SNP (transition)   |               | 818,459       | 816068 C -> T | moaD  | b0784 | GAC -> GAT   | SILENT      | D63       | ER2796_802 |                 |
| SNP (transition)   |               | 855,657       | 853266 C -> T | ybiT  | b0820 | CCT -> TCT   | MISSSENSE   | P158S     | ER2796_838 |                 |
| SNP (transversion) |               | 856,264       | 853873 C -> A | ybiT  | b0820 | ACG -> AAG   | MISSSENSE   | T360K     | ER2796_838 |                 |
| SNP (transition)   |               | 891,721       | 889329 G -> A | rimK  | b0852 | GAA -> AAA   | MISSSENSE   | E178K     | ER2796_870 |                 |
| SNP (transition)   |               | 898,168       | 895776 G -> A | rlmC  | b0859 | CGT -> CAT   | MISSSENSE   | R143H     | ER2796_878 |                 |
| SNP (transition)   |               | 908,317       | 905925 G -> A | ltaE  | b0870 | CTC -> CTT   | SILENT      | L67       | ER2796_889 |                 |
| SNP (transition)   |               | 961,728       | 959336 C -> T | rpsA  | b0911 | CGT -> TGT   | MISSSENSE   | R171C     | ER2796_932 |                 |
| SNP (transition)   |               | 972,800       | 970408 C -> T | smtA  | b0921 | TCC -> TTC   | MISSSENSE   | S14F      | ER2796_942 |                 |

|                    |           |                |       |       |            |            |          |             |                    |
|--------------------|-----------|----------------|-------|-------|------------|------------|----------|-------------|--------------------|
| SNP (transversion) | 1,004,914 | 1002522 T -> A | pyrD  | b0945 | ATT -> ATA | SILENT     | I308     | ER2796_968  |                    |
| SNP (transition)   | 1,004,926 | 1002534 C -> T | pyrD  | b0945 | GCC -> GCT | SILENT     | A312     | ER2796_968  |                    |
| SNP (transition)   | 1,005,312 | 1002920 C -> T | zapC  | b0946 | CCC -> CCT | SILENT     | P46      | ER2796_970  |                    |
| SNP (transition)   | 1,010,843 | 1008451 G -> A | uup   | b0949 | GAA -> AAA | MISSENSE   | E553K    | ER2796_972  |                    |
| SNP (transition)   | 1,042,830 | 1040438 G -> A | etk   | b0981 | CTG -> TTG | SILENT     | L202     | ER2796_1004 |                    |
| SNP (transition)   | 1,049,315 | 1046923 C -> T | insA  | b4516 | TCA -> TTA | MISSENSE   | S87L     | ER2796_4627 | c                  |
| SNP (transition)   | 1,049,315 | 1046923 C -> T | insB1 | b0988 | CTC -> CTT | SILENT     | L22      | ER2796_0911 | c                  |
| SNP (transversion) | 1,145,302 | 1143091 C -> A | yceF  | b1087 | GTT -> TTT | MISSENSE   | V173F    | ER2796_1115 |                    |
| SNP (transversion) | 1,157,125 | 1154914 G -> T | ptsG  | b1101 | GTC -> TTC | MISSENSE   | V12F     | ER2796_1130 |                    |
| SNP (transition)   | 1,169,059 | 1166848 A -> G | ycfS  | b1113 | CTG -> CCG | MISSENSE   | L180P    | ER2796_1142 | a                  |
| SNP (transition)   | 1,189,104 | 1186893 G -> A | phoP  | b1130 | ACC -> ACT | SILENT     | T189     | ER2796_1160 |                    |
| SNP (transition)   | 1,189,203 | 1186992 A -> G | phoP  | b1130 | ACT -> ACC | SILENT     | T156     | ER2796_1160 | a                  |
| SNP (transition)   | 1,219,716 | 1202301 C -> T | ycgH  | b4491 | TCC -> TTC | MISSENSE   | S298F    | -           | d                  |
| SNP (transition)   | 1,232,892 | 1215477 G -> A | nhaB  | b1186 | TCT -> TTT | MISSENSE   | S350F    | ER2796_1197 |                    |
| SNP (transition)   | 1,290,170 | 1272577 C -> T | rssB  | b1235 | CAA -> TAA | NONSENSE   | Q236stop | ER2796_1251 | Removes aa 236-337 |
| SNP (transversion) | 1,292,215 | 1274622 A -> C | -     | -     | -          | INTERGENIC | -        | -           |                    |
| SNP (transversion) | 1,300,016 | 1282423 A -> T | oppA  | b1243 | AAT -> TAT | MISSENSE   | N271Y    | ER2796_1262 | a                  |
| SNP (transversion) | 1,304,760 | 1287167 T -> G | oppF  | b1247 | TCC -> GCC | MISSENSE   | S325A    | ER2796_1266 | a                  |
| SNP (transition)   | 1,310,701 | 1293108 C -> T | yciB  | b1254 | GAG -> AAG | MISSENSE   | E72K     | ER2796_1274 |                    |
| SNP (transition)   | 1,319,610 | 1302017 C -> T | trpE  | b1264 | GGT -> GAT | MISSENSE   | G454D    | ER2796_1284 |                    |
| SNP (transition)   | 1,331,687 | 1314094 T -> C | -     | -     | -          | INTERGENIC | -        | -           |                    |
| SNP (transition)   | 1,335,418 | 1317825 A -> G | acnA  | b1276 | AGC -> GGC | MISSENSE   | S522G    | ER2796_1297 | a                  |
| SNP (transition)   | 1,344,271 | 1326677 C -> T | gmr   | b1285 | GCT -> ACT | MISSENSE   | A166T    | ER2796_1309 |                    |
| SNP (transition)   | 1,354,698 | 1337104 G -> A | sapA  | b1294 | CCC -> CTC | MISSENSE   | P146L    | ER2796_1318 |                    |
| SNP (transition)   | 1,356,797 | 1339203 C -> T | puuP  | b1296 | GTA -> ATA | MISSENSE   | V139I    | ER2796_1320 |                    |
| SNP (transition)   | 1,356,883 | 1339289 T -> C | puuP  | b1296 | TAT -> TGT | MISSENSE   | Y110C    | ER2796_1320 | a                  |
| SNP (transition)   | 1,363,791 | 1346197 C -> T | puuE  | b1302 | ACC -> ATC | MISSENSE   | T73I     | ER2796_1328 |                    |
| SNP (transversion) | 1,365,250 | 1347656 C -> A | pspF  | b1303 | TTG -> TTT | MISSENSE   | L229F    | ER2796_1329 | b                  |
| SNP (transition)   | 1,369,943 | 1352349 C -> T | ycjN  | b1310 | TCA -> TTA | MISSENSE   | S4L      | ER2796_1336 |                    |
| SNP (transversion) | 1,372,522 | 1354928 G -> T | ycjP  | b1312 | GGC -> TGC | MISSENSE   | G137C    | ER2796_1338 |                    |
| SNP (transition)   | 1,403,782 | 1386188 G -> A | -     | -     | -          | INTERGENIC | -        | -           |                    |
| SNP (transition)   | 1,427,274 | 1409679 C -> T | stfR  | b1372 | CCG -> TCG | MISSENSE   | P68S     | ER2796_1398 |                    |
| SNP (transition)   | 1,431,168 | 1413573 G -> A | pinR  | b1374 | TTC -> TTT | SILENT     | F177     | ER2796_1400 |                    |
| SNP (transition)   | 1,443,652 | 1426057 C -> T | ydbH  | b1381 | CAG -> TAG | NONSENSE   | Q860stop | ER2796_1409 | Removes aa 860-879 |
| SNP (transversion) | 1,457,197 | 1439602 G -> T | paaH  | b1395 | GCG -> GCT | SILENT     | A40      | ER2796_1424 |                    |
| SNP (transition)   | 1,484,325 | 1466730 C -> T | hrpA  | b1413 | CCA -> TCA | MISSENSE   | P1081S   | ER2796_1443 |                    |
| SNP (transition)   | 1,529,713 | 1512118 A -> G | -     | -     | -          | INTERGENIC | -        | -           |                    |
| SNP (transversion) | 1,542,750 | 1525155 G -> C | yddK  | b1471 | GCC -> GGC | MISSENSE   | A330G    | -           | d                  |
| SNP (transversion) | 1,549,014 | 1531419 A -> T | fdnH  | b1475 | AAA -> ATA | MISSENSE   | K177I    | ER2796_1510 |                    |
| SNP (transversion) | 1,551,654 | 1534059 C -> A | adhP  | b1478 | GGT -> GTT | MISSENSE   | G70V     | ER2796_1513 |                    |
| SNP (transition)   | 1,598,258 | 1580662 C -> T | -     | -     | -          | INTERGENIC | -        | -           |                    |

|                    |                 |                          |      |       |            |            |          |             |                    |
|--------------------|-----------------|--------------------------|------|-------|------------|------------|----------|-------------|--------------------|
| SNP (transversion) | 1,599,122       | 1581526 C -> A           | lsrR | b1512 | TCG -> TCT | SILENT     | S48      | ER2796_1549 |                    |
| SNP (transition)   | 1,599,127       | 1581531 C -> T           | lsrR | b1512 | GTG -> ATG | MISSENSE   | V47M     | ER2796_1549 |                    |
| SNP (transition)   | 1,606,154       | 1588558 T -> C           | yneE | b1520 | GAT -> GGT | MISSENSE   | D298G    | ER2796_1557 |                    |
| SNP (transition)   | 1,630,736       | 1613140 A -> G           | -    | -     | -          | INTERGENIC | -        | -           | e                  |
| SNP (transition)   | 1,630,759       | 1613163 G -> A           | -    | -     | -          | INTERGENIC | -        | -           | e                  |
| SNP (transition)   | 1,630,794       | 1613198 T -> C           | -    | -     | -          | INTERGENIC | -        | -           | e                  |
| SNP (transition)   | 1,630,861       | 1613265 A -> G           | -    | -     | -          | INTERGENIC | -        | -           | e                  |
| SNP (transversion) | 1,630,937       | 1613341 A -> T           | -    | -     | -          | INTERGENIC | -        | -           | e                  |
| SNP (transversion) | 1,630,940       | 1613344 T -> G           | -    | -     | -          | INTERGENIC | -        | -           | e                  |
| SNP (transition)   | 1,630,973       | 1613377 C -> T           | -    | -     | -          | INTERGENIC | -        | -           | e                  |
| SNP (transversion) | 1,631,247       | 1613651 A -> C           | ydfK | b1544 | AAA -> ACA | MISSENSE   | K51T     | ER2796_1584 | e                  |
| SNP (transition)   | 1,639,026       | 1622768 T -> C           | -    | -     | -          | INTERGENIC | -        | -           |                    |
| SNP (transversion) | 1,641,703       | 1625445 A -> T           | ydfU | b1560 | CTG -> CAG | MISSENSE   | L209Q    | ER2796_1601 | a                  |
| SNP (transition)   | 1,646,986       | 1630728 C -> T           | ydfC | b1573 | TCC -> TTC | MISSENSE   | S47F     | ER2796_1610 |                    |
| SNP (transition)   | 1,647,995       | 1631737 C -> T           | ydfD | b1576 | CCG -> TCG | MISSENSE   | P60S     | ER2796_1613 |                    |
| SNP (transition)   | 1,650,355       | 1634097 T -> C           | intQ | b1579 | TTC -> CTC | MISSENSE   | F261L    | -           | d                  |
| SNP (transition)   | 1,669,476       | 1653218 C -> T           | asr  | b1597 | ACC -> ATC | MISSENSE   | T26I     | ER2796_1634 |                    |
| SNP (transition)   | 1,679,937       | 1663679 G -> A           | ydgC | b1607 | CTT -> TTT | MISSENSE   | L40F     | ER2796_1643 |                    |
| SNP (transition)   | 1,700,781       | 1684523 C -> T           | add  | b1623 | TTC -> TTT | SILENT     | F175     | ER2796_1660 |                    |
| SNP (transition)   | 1,764,633       | 1748375 G -> A           | ydiJ | b1687 | CGC -> TGC | MISSENSE   | R693C    | ER2796_1729 |                    |
| SNP (transition)   | 1,789,661       | 1773403 G -> A           | cdgR | b1707 | CGC -> CGT | SILENT     | R128     | ER2796_1749 |                    |
| SNP (transition)   | 1,804,097       | 1787838 A -> G           | ydiY | b1722 | TTG -> TCG | MISSENSE   | L4S      | ER2796_1766 |                    |
| SNP (transition)   | 1,823,473       | 1807214 G -> A           | spy  | b1743 | GAC -> GAT | SILENT     | D59      | ER2796_1787 |                    |
| SNP (transition)   | 1,826,853       | 1810594 G -> A           | astD | b1746 | AGC -> AGT | SILENT     | S302     | ER2796_1790 |                    |
| SNP (transition)   | 1,872,226       | 1855967 G -> A           | -    | -     | -          | INTERGENIC | -        | -           |                    |
| SNP (transition)   | 1,890,902       | 1874643 C -> T           | yoaA | b1808 | GGC -> AGC | MISSENSE   | G120S    | ER2796_1855 |                    |
| SNP (transition)   | 1,892,863       | 1876604 T -> C           | pabB | b1812 | CTC -> CCC | MISSENSE   | L12P     | ER2796_1860 | a                  |
| Substitution       | 1909953-1909954 | 1893694-1893695 CC -> TT | htpX | b1829 | TGG -> TAA | NONSENSE   | W216stop | ER2796_1878 | Removes aa 216-293 |
| SNP (transition)   | 1,918,646       | 1902387 C -> T           | rsmF | b1835 | CAA -> TAA | NONSENSE   | Q134stop | ER2796_1886 | Removes aa 134-479 |
| SNP (transition)   | 1,951,319       | 1935060 G -> A           | cmoA | b1870 | AAG -> AAA | SILENT     | K198     | ER2796_1922 |                    |
| SNP (transition)   | 1,985,082       | 1968047 C -> T           | ftnB | b1902 | GCC -> GTC | MISSENSE   | A45V     | ER2796_1953 |                    |
| SNP (transition)   | 1,991,357       | 1974322 C -> T           | uvrC | b1913 | AAG -> AAA | SILENT     | K458     | ER2796_1966 |                    |
| SNP (transition)   | 2,029,184       | 2012149 C -> T           | dcm  | b1961 | GAG -> GAA | SILENT     | E386     | ER2796_2012 |                    |
| SNP (transition)   | 2,030,207       | 2013172 C -> T           | dcm  | b1961 | TGG -> TGA | NONSENSE   | W45stop  | ER2796_2012 | Removes aa 45-472  |
| SNP (transition)   | 2,031,672       | 2014637 C -> T           | -    | -     | -          | INTERGENIC | -        | -           |                    |
| SNP (transversion) | 2,038,457       | 2021422 C -> A           | yedY | b1971 | GCC -> GAC | MISSENSE   | A319D    | ER2796_2024 | a                  |
| SNP (transition)   | 2,082,078       | 2074199 G -> A           | sbcB | b2011 | CAG -> CAA | SILENT     | Q433     | ER2796_2075 |                    |
| SNP (transversion) | 2,097,549       | 2089634 A -> T           | ugd  | b2028 | ATT -> AAT | MISSENSE   | I30N     | ER2796_2091 |                    |
| SNP (transition)   | 2,137,015       | 2129099 G -> A           | yegH | b2063 | GAA -> AAA | MISSENSE   | E364K    | ER2796_2125 |                    |
| SNP (transition)   | 2,153,904       | 2145988 C -> T           | mdtB | b2075 | CTC -> CTT | SILENT     | L206     | ER2796_2137 |                    |
| SNP (transition)   | 2,171,470       | 2163554 C -> T           | gatC | b2092 | CAG -> CAA | SILENT     | Q277     | ER2796_2154 |                    |

|                    |                 |                          |      |       |            |            |          |             |                    |
|--------------------|-----------------|--------------------------|------|-------|------------|------------|----------|-------------|--------------------|
| SNP (transition)   | 2,222,191       | 2214275 A -> G           | pbpG | b2134 | TTT -> TTC | SILENT     | F234     | ER2796_2198 |                    |
| SNP (transversion) | 2,235,127       | 2227211 G -> T           | mgIC | b2148 | CCG -> ACG | MISSENSE   | P217T    | ER2796_2214 |                    |
| Substitution       | 2262482-2262483 | 2255343-2255344 GA -> AT | setB | b2170 | GAG -> ATG | MISSENSE   | E200M    | ER2796_2240 |                    |
| SNP (transversion) | 2,296,319       | 2289180 A -> T           | napB | b2203 | TTT -> TAT | MISSENSE   | F141Y    | ER2796_2274 |                    |
| SNP (transversion) | 2,317,100       | 2309961 C -> A           | rcsC | b2218 | GAT -> TAT | MISSENSE   | D267Y    | ER2796_2290 |                    |
| SNP (transversion) | 2,390,255       | 2383115 C -> G           | nuoM | b2277 | GGT -> GCT | MISSENSE   | G270A    | ER2796_2353 |                    |
| SNP (transition)   | 2,421,913       | 2414773 C -> T           | hisP | b2306 | GTA -> ATA | MISSENSE   | V207I    | ER2796_2383 |                    |
| SNP (transition)   | 2,441,469       | 2434329 G -> A           | mnmC | b2324 | GCG -> ACG | MISSENSE   | A562T    | ER2796_2403 |                    |
| SNP (transition)   | 2,447,086       | 2439946 G -> A           | smrB | b2331 | ATG -> ATA | MISSENSE   | M153I    | ER2796_2410 |                    |
| SNP (transition)   | 2,508,631       | 2501492 C -> T           | yfeO | b2389 | CCG -> CTG | MISSENSE   | P327L    | ER2796_2471 |                    |
| SNP (transition)   | 2,585,134       | 2571205 C -> T           | narQ | b2469 | GCA -> GTA | MISSENSE   | A461V    | ER2796_2544 |                    |
| SNP (transition)   | 2,628,874       | 2614945 G -> A           | yfgI | b2506 | AGC -> AAC | MISSENSE   | S176N    | ER2796_2584 |                    |
| SNP (transition)   | 2,629,418       | 2615489 G -> A           | guaA | b2507 | TTC -> TTT | SILENT     | F380     | ER2796_2585 |                    |
| SNP (transition)   | 2,724,405       | 2710476 C -> T           | rrlG | b2589 | -          | rRNA       | -        | -           | e                  |
| SNP (transition)   | 2,724,408       | 2710479 T -> C           | rrlG | b2590 | -          | rRNA       | -        | -           | e                  |
| SNP (transition)   | 2,724,411       | 2710482 A -> G           | rrlG | b2591 | -          | rRNA       | -        | -           | e                  |
| SNP (transition)   | 2,724,413       | 2710484 G -> A           | rrlG | b2592 | -          | rRNA       | -        | -           | e                  |
| SNP (transition)   | 2,731,014       | 2717085 G -> A           | clpB | b2592 | ATC -> ATT | SILENT     | I394     | ER2796_2675 |                    |
| SNP (transition)   | 2,802,155       | 2788234 C -> T           | nrdF | b2676 | TCT -> TTT | MISSENSE   | S211F    | ER2796_2749 |                    |
| SNP (transition)   | 2,812,483       | 2798561 C -> T           | luxS | b2687 | CTG -> CTA | SILENT     | L91      | ER2796_2762 |                    |
| SNP (transversion) | 2,847,158       | 2833236 C -> A           | hycC | b2723 | GGA -> TGA | NONSENSE   | G36stop  | ER2796_2802 | Removes aa 36-608  |
| SNP (transition)   | 2,865,477       | 2851555 G -> A           | rpoS | b2741 | CAG -> TAG | NONSENSE   | Q33stop  | ER2796_2821 | Removes aa 33-330  |
| SNP (transversion) | 2,869,175       | 2855253 T -> G           | truD | b2745 | AAC -> ACC | MISSENSE   | N51T     | ER2796_2826 |                    |
| SNP (transition)   | 2,906,979       | 2893057 G -> A           | pyrG | b2780 | TCT -> TTT | MISSENSE   | S237F    | ER2796_2865 |                    |
| Substitution       | 2924565-2924566 | 2910643-2910644 CC -> TT | ygdH | b2795 | CCC -> CTT | MISSENSE   | P79L     | ER2796_2882 |                    |
| SNP (transversion) | 2,924,794       | 2910872 C -> A           | ygdH | b2795 | GGC -> GGA | SILENT     | G155     | ER2796_2882 |                    |
| SNP (transition)   | 2,979,946       | 2966024 C -> T           | araE | b2841 | GGG -> AGG | MISSENSE   | G87R     | ER2796_2930 |                    |
| SNP (transition)   | 2,980,022       | 2966100 C -> T           | araE | b2841 | CAG -> CAA | SILENT     | Q61      | ER2796_2930 |                    |
| SNP (transition)   | 2,983,541       | 2969619 G -> A           | yqeF | b2844 | TCC -> TTC | MISSENSE   | S25F     | ER2796_2933 |                    |
| SNP (transition)   | 2,991,235       | 2977313 C -> T           | ygeH | b2852 | CTC -> TTC | MISSENSE   | L374F    | ER2796_2941 |                    |
| SNP (transition)   | 3,038,864       | 3024942 G -> A           | cptB | b2897 | CAG -> TAG | NONSENSE   | Q77stop  | ER2796_2983 | Removes aa 77-88   |
| SNP (transition)   | 3,038,865       | 3024943 G -> A           | cptB | b2897 | ATC -> ATT | SILENT     | I76      | ER2796_2983 |                    |
| SNP (transition)   | 3,041,382       | 3027460 G -> A           | yqfB | b2900 | ATC -> ATT | SILENT     | I88      | ER2796_2987 |                    |
| SNP (transition)   | 3,069,434       | 3055512 C -> T           | -    | -     | -          | INTERGENIC | -        | -           |                    |
| SNP (transversion) | 3,087,131       | 3073209 A -> T           | galP | b2943 | AAA -> TAA | NONSENSE   | K276stop | ER2796_3029 | Removes aa 276-464 |
| SNP (transition)   | 3,130,554       | 3116632 G -> A           | yghR | b2984 | CCC -> CCT | SILENT     | P227     | ER2796_3074 |                    |
| SNP (transition)   | 3,159,638       | 3145716 G -> A           | ftsP | b3017 | CGC -> TGC | MISSENSE   | R352C    | ER2796_3108 |                    |
| SNP (transition)   | 3,165,588       | 3151666 C -> T           | ygiS | b3020 | GTG -> GTA | SILENT     | V51      | ER2796_3111 |                    |
| SNP (transition)   | 3,284,577       | 3271853 C -> T           | agal | b3141 | CCA -> TCA | MISSENSE   | P96S     | ER2796_3234 |                    |
| SNP (transversion) | 3,327,765       | 3315040 G -> T           | dacB | b3182 | GAT -> TAT | MISSENSE   | D261Y    | ER2796_3276 |                    |
| SNP (transversion) | 3,386,063       | 3356988 T -> G           | aaeB | b3240 | ACG -> CCG | MISSENSE   | T50P     | ER2796_3325 |                    |

|                    |                 |                          |      |       |            |            |        |             |      |
|--------------------|-----------------|--------------------------|------|-------|------------|------------|--------|-------------|------|
| SNP (transition)   | 3,390,542       | 3361467 G -> A           | yhdP | b4472 | CCG -> TCG | MISSENSE   | P1247S | ER2796_3330 |      |
| SNP (transversion) | 3,422,257       | 3393182 A -> C           | rrlD | b3275 | -          | rRNA       | -      | -           | a, e |
| SNP (transversion) | 3,422,258       | 3393183 T -> A           | rrlD | b3275 | -          | rRNA       | -      | -           | a, e |
| SNP (transition)   | 3,422,259       | 3393184 C -> T           | rrlD | b3275 | -          | rRNA       | -      | -           | a, e |
| SNP (transition)   | 3,430,127       | 3401052 C -> T           | smg  | b3284 | CTG -> CTA | SILENT     | L120   | ER2796_3371 |      |
| SNP (transition)   | 3,441,983       | 3412908 G -> A           | secY | b3300 | GCC -> GTC | MISSENSE   | A46V   | ER2796_3386 |      |
| SNP (transition)   | 3,442,002       | 3412927 G -> A           | secY | b3300 | CCG -> TCG | MISSENSE   | P40S   | ER2796_3386 |      |
| SNP (transition)   | 3,450,044       | 3420969 G -> A           | rplD | b3319 | CCG -> TCG | MISSENSE   | P89S   | ER2796_3405 |      |
| SNP (transition)   | 3,450,240       | 3421165 G -> A           | rplD | b3319 | TTC -> TTT | SILENT     | F23    | ER2796_3405 |      |
| SNP (transition)   | 3,454,055       | 3424980 T -> C           | gspC | b3324 | ACT -> ACC | SILENT     | T152   | ER2796_3410 |      |
| SNP (transition)   | 3,455,400       | 3426325 C -> T           | gspD | b3325 | CTC -> CTT | SILENT     | L334   | ER2796_3411 |      |
| SNP (transversion) | 3,456,267       | 3427192 A -> C           | gspD | b3325 | TCA -> TCC | SILENT     | S623   | ER2796_3411 |      |
| SNP (transversion) | 3,472,313       | 3443238 T -> G           | rpsL | b3342 | AAA -> CAA | MISSENSE   | K88Q   | ER2796_3428 |      |
| SNP (transversion) | 3,472,447       | 3443372 T -> G           | rpsL | b3342 | AAA -> ACA | MISSENSE   | K43T   | ER2796_3428 |      |
| SNP (transition)   | 3,486,778       | 3457703 G -> A           | yhfK | b3358 | GCA -> ACA | MISSENSE   | A656T  | ER2796_3445 |      |
| SNP (transition)   | 3,492,701       | 3463626 C -> T           | nirB | b3365 | ACC -> ACT | SILENT     | T223   | ER2796_3453 |      |
| SNP (transition)   | 3,536,021       | 3507679 C -> T           | yhgF | b3407 | TTC -> TTT | SILENT     | F205   | ER2796_3497 |      |
| SNP (transversion) | 3,553,069       | 3524727 G -> C           | malT | b3418 | GTC -> CTC | MISSENSE   | V655L  | ER2796_3508 |      |
| SNP (transition)   | 3,604,914       | 3576572 C -> T           | zntA | b3469 | TTC -> TTT | SILENT     | F147   | ER2796_3560 |      |
| SNP (transversion) | 3,615,402       | 3587060 T -> A           | nikD | b3479 | ATA -> AAA | MISSENSE   | I122K  | ER2796_3570 |      |
| SNP (transversion) | 3,622,568       | 3594226 T -> A           | yhhI | b3484 | GAT -> GAA | MISSENSE   | D56E   | ER2796_3574 |      |
| Substitution       | 3629379-3629380 | 3601037-3601038 TT -> AG | yhiJ | b3488 | AAT -> CTT | MISSENSE   | N412L  | ER2796_3579 |      |
| SNP (transition)   | 3,645,451       | 3617109 C -> T           | gor  | b3500 | GCG -> GTG | MISSENSE   | A377V  | ER2796_3593 |      |
| SNP (transition)   | 3,658,805       | 3630463 G -> A           | mdtF | b3514 | CAG -> CAA | SILENT     | Q123   | ER2796_3610 |      |
| SNP (transition)   | 3,677,531       | 3649189 C -> T           | kdgK | b3526 | ACC -> ACT | SILENT     | T30    | ER2796_3624 |      |
| SNP (transition)   | 3,684,728       | 3656386 G -> A           | bcsC | b3530 | TTC -> TTT | SILENT     | F823   | ER2796_3629 |      |
| SNP (transversion) | 3,705,970       | 3678827 C -> A           | -    | -     | -          | INTERGENIC | -      | -           |      |
| SNP (transition)   | 3,710,430       | 3683287 G -> A           | yhjY | b3548 | GGC -> GGT | SILENT     | G176   | ER2796_3651 |      |
| SNP (transversion) | 3,723,199       | 3696056 T -> G           | glyQ | b3560 | GAG -> GCG | MISSENSE   | E48A   | ER2796_3664 | a    |
| SNP (transition)   | 3,726,511       | 3699368 G -> A           | xylB | b3564 | GCG -> GTG | MISSENSE   | A295V  | ER2796_3669 |      |
| SNP (transition)   | 3,727,978       | 3700835 G -> A           | xylA | b3565 | CAC -> TAC | MISSENSE   | H271Y  | ER2796_3670 |      |
| SNP (transition)   | 3,727,979       | 3700836 G -> A           | xylA | b3565 | AAC -> AAT | SILENT     | N270   | ER2796_3670 |      |
| SNP (transition)   | 3,746,801       | 3720435 G -> A           | yiaQ | b3581 | GCT -> ACT | MISSENSE   | A68T   | ER2796_3688 |      |
| SNP (transversion) | 3,761,159       | 3734793 A -> C           | rhsA | b3593 | CCA -> CCC | SILENT     | P318   | ER2796_3702 |      |
| SNP (transition)   | 3,767,470       | 3741104 G -> A           | yibV | b4615 | GAA -> AAA | MISSENSE   | E35K   | -           | d    |
| SNP (transition)   | 3,782,006       | 3755638 G -> A           | secB | b3609 | TCC -> TTC | MISSENSE   | S49F   | ER2796_3720 |      |
| SNP (transition)   | 3,798,910       | 3772542 C -> T           | rfaY | b3625 | GAC -> AAC | MISSENSE   | D27N   | ER2796_3736 |      |
| SNP (transition)   | 3,863,908       | 3837541 A -> G           | yidE | b3685 | GTT -> GCT | MISSENSE   | V130A  | ER2796_3797 |      |
| SNP (transition)   | 3,897,218       | 3870851 C -> T           | yieK | b3718 | GAA -> AAA | MISSENSE   | E67K   | ER2796_3830 |      |
| SNP (transition)   | 3,901,257       | 3874890 G -> A           | bglB | b3721 | GTC -> GTT | SILENT     | V156   | ER2796_3833 |      |
| SNP (transversion) | 3,934,223       | 3907856 G -> C           | rbsC | b3750 | GTC -> CTC | MISSENSE   | V305L  | ER2796_3863 |      |

|                    |           |                |      |       |            |            |       |             |   |
|--------------------|-----------|----------------|------|-------|------------|------------|-------|-------------|---|
| SNP (transition)   | 3,942,817 | 3916450 G -> A | rrlC | b3758 | -          | rRNA       | -     | -           |   |
| SNP (transition)   | 3,942,917 | 3916550 G -> A | rrlC | b3759 | -          | rRNA       | -     | -           |   |
| SNP (transition)   | 3,957,957 | 3931590 C -> T | -    | -     | -          | INTERGENIC | -     | -           |   |
| SNP (transversion) | 3,959,685 | 3933318 G -> T | rep  | b3778 | GGC -> GTC | MISSENSE   | G329V | ER2796_3888 |   |
| SNP (transition)   | 3,963,197 | 3936830 G -> A | rhlB | b3780 | CAC -> TAC | MISSENSE   | H153Y | ER2796_3890 |   |
| SNP (transition)   | 3,966,706 | 3940339 G -> A | rfe  | b3784 | ATG -> ATA | MISSENSE   | M256I | ER2796_3895 |   |
| SNP (transition)   | 3,967,771 | 3941404 T -> C | wzzE | b3785 | TCG -> CCG | MISSENSE   | S240P | ER2796_3896 |   |
| SNP (transition)   | 3,991,554 | 3965187 T -> C | cyaA | b3806 | CGT -> CGC | SILENT     | R793  | ER2796_3919 | a |
| SNP (transversion) | 4,033,757 | 4007390 T -> G | rrsA | b3851 | -          | rRNA       | -     | -           | a |
| SNP (transition)   | 4,164,671 | 4138302 G -> A | -    | -     | -          | INTERGENIC | -     | -           | e |
| SNP (transversion) | 4,166,238 | 4139869 A -> T | -    | -     | -          | INTERGENIC | -     | -           | e |
| SNP (transition)   | 4,166,244 | 4139875 T -> C | -    | -     | -          | INTERGENIC | -     | -           | e |
| SNP (transition)   | 4,166,495 | 4140040 G -> A | -    | -     | -          | INTERGENIC | -     | -           | e |
| SNP (transversion) | 4,166,498 | 4140043 G -> T | -    | -     | -          | INTERGENIC | -     | -           | e |
| SNP (transition)   | 4,166,499 | 4140044 A -> G | -    | -     | -          | INTERGENIC | -     | -           | e |
| SNP (transition)   | 4,206,155 | 4179698 G -> A | -    | -     | -          | INTERGENIC | -     | -           |   |
| SNP (transition)   | 4,221,661 | 4195204 T -> C | -    | -     | -          | INTERGENIC | -     | -           |   |
| SNP (transition)   | 4,239,471 | 4213791 A -> G | xylE | b4031 | CGT -> CGC | SILENT     | R269  | ER2796_4163 |   |
| SNP (transversion) | 4,276,098 | 4250418 T -> A | -    | -     | -          | INTERGENIC | -     | -           |   |
| SNP (transition)   | 4,294,291 | 4268611 T -> C | -    | -     | -          | INTERGENIC | -     | -           |   |
| SNP (transition)   | 4,294,988 | 4269197 G -> A | yjcO | b4078 | GCC -> GTC | MISSENSE   | A54V  | ER2796_4217 |   |
| SNP (transition)   | 4,363,457 | 4337666 G -> A | -    | -     | -          | INTERGENIC | -     | -           |   |
| SNP (transition)   | 4,398,277 | 4372486 C -> T | -    | -     | -          | INTERGENIC | -     | -           |   |
| SNP (transition)   | 4,405,349 | 4379558 G -> A | rnr  | b4179 | GAT -> AAT | MISSENSE   | D225N | ER2796_4325 |   |
| SNP (transversion) | 4,405,736 | 4379945 G -> C | rnr  | b4179 | GTG -> CTG | MISSENSE   | V354L | ER2796_4325 |   |
| SNP (transition)   | 4,421,360 | 4395569 C -> T | ulaE | b4197 | TCC -> TCT | SILENT     | S164  | ER2796_4343 |   |
| SNP (transition)   | 4,447,609 | 4421818 G -> A | ppa  | b4226 | CCG -> TCG | MISSENSE   | P23S  | ER2796_4371 |   |
| SNP (transition)   | 4,464,569 | 4438778 G -> A | treR | b4241 | ACC -> ATC | MISSENSE   | T234I | ER2796_4386 |   |
| SNP (transition)   | 4,471,923 | 4446132 C -> T | yjgl | b4249 | GGA -> AGA | MISSENSE   | G52R  | ER2796_4392 |   |
| SNP (transition)   | 4,473,516 | 4447725 T -> C | yjgL | b4253 | TTT -> TTC | SILENT     | F19   | ER2796_4395 |   |
| SNP (transition)   | 4,491,121 | 4465330 C -> T | idnO | b4266 | GGC -> GAC | MISSENSE   | G85D  | ER2796_4409 | b |
| SNP (transversion) | 4,508,261 | 4482470 T -> G | -    | -     | -          | INTERGENIC | -     | -           |   |
| SNP (transition)   | 4,610,121 | 4529109 G -> A | -    | -     | -          | INTERGENIC | -     | -           |   |
| SNP (transition)   | 4,610,810 | 4529798 G -> A | yjjU | b4377 | CGG -> CAG | MISSENSE   | R126Q | ER2796_4486 |   |
| SNP (transition)   | 4,613,682 | 4532670 A -> G | yjJl | b4380 | CGT -> CGC | SILENT     | R469  | ER2796_4489 |   |
| SNP (transition)   | 4,616,579 | 4535567 C -> T | deoA | b4382 | CCG -> TCG | MISSENSE   | P110S | ER2796_4493 |   |
| SNP (transition)   | 4,620,335 | 4539323 C -> T | yjJ  | b4385 | CTC -> TTC | MISSENSE   | L182F | ER2796_4496 |   |
| SNP (transition)   | 4,634,065 | 4553053 G -> A | creB | b4398 | GAG -> GAA | SILENT     | E12   | ER2796_4510 |   |
| SNP (transversion) | 4,634,948 | 4553936 G -> C | creC | b4399 | CGC -> CCC | MISSENSE   | R77P  | ER2796_4511 |   |
| SNP (transition)   | 4,635,315 | 4554303 C -> T | creC | b4399 | GGC -> GGT | SILENT     | G199  | ER2796_4511 |   |
| SNP (transition)   | 4,636,263 | 4555251 G -> A | creD | b4400 | TTG -> TTA | SILENT     | L21   | ER2796_4512 |   |



|                  |           |                |   |   |   |            |   |   |
|------------------|-----------|----------------|---|---|---|------------|---|---|
| SNP (transition) | 4,637,554 | 4556542 G -> A | - | - | - | INTERGENIC | - | - |
|------------------|-----------|----------------|---|---|---|------------|---|---|

### Footnotes

- a Shared with DH10b
- b Not in ER3413
- c Same mutation affects both overlapping ORFs
- d MG1655 pseudogene
- e These consecutive changes (orange shading) from a single gene conversion event
