# Supplementary material for: Complete Genome Sequence of ER2796, a DNA Methyltransferase-Deficient Strain of Escherichia coli K-12
Source: PubMed Central journal article supplement (PMC4444293; doi:10.1371/journal.pone.0127446), 2015-05-26
Supplement: pone.0127446.s003.pdf [file pone.0127446.s003.pdf]

**Table S2A. List of ORFs with nonsynonymous changes from the reference strain MG1655 to ER2796 (disrupted ORFs).**

| MG1655 Gene | MG1655 Locus | ER2796 Gene | ER2796 Locus     | ER2796 Start..Stop | Disruption               | Intervening ORFs       | MG1655 Functional Description                                                                                                           |
|-------------|--------------|-------------|------------------|--------------------|--------------------------|------------------------|-----------------------------------------------------------------------------------------------------------------------------------------|
| fhuA        | b0150        | fhuA        | ER2796_149/151   | 167484..171063     | IS2 insertion            | ER2796_148, ER2796_150 | ferrichrome outer membrane transporter                                                                                                  |
| rcIA        | b0304        | rcIA        | ER2796_311/-     | 321899..319236     | IS10 insertion           | ER2796_310             | putative pyridine nucleotide-disulfide oxidoreductase                                                                                   |
| lacZ        | b0344        | lacZ        | ER2796_352       | 365759..364971     | deletion                 | -                      | beta-D-galactosidase                                                                                                                    |
| ybcV        | b0558        | ybcV        | -                | 575649..575239     | deletion                 | -                      | DLP12 prophage; putative protein                                                                                                        |
| nohD        | b0560        | nohD        | ER2796_-/567     | 576889..578211     | IS1 insertion            | ER2796_565, ER2796_566 | DLP12 prophage; DNA packaging protein                                                                                                   |
| yljE        | b0833        | yljE        | ER2796_-/851     | 869811..872158     | frameshift               | -                      | putative membrane-anchored cyclic-di-GMP phosphodiesterase                                                                              |
| rssB        | b1235        | rssB        | ER2796_1251/1252 | 1271872..1272885   | nonsense                 | -                      | response regulator binding RpoS to initiate proteolysis by ClpXP; required for the PcnB-degradosome interaction during stationary phase |
| yciT        | b1284        | yciT        | ER2796_1307/1306 | 1324776..1324028   | frameshift               | -                      | global regulator of transcription; DeoR family                                                                                          |
| ydbH        | b1381        | ydbH        | ER2796_1409/-    | 1423480..1426119   | nonsense                 | -                      | hypothetical protein                                                                                                                    |
| btuD        | b1709        | btuD        | ER2796_1752/1751 | 1775323..1774575   | frameshift               | -                      | vitamin B12 transporter subunit : ATP-binding component of ABC superfamily                                                              |
| htpX        | b1829        | htpX        | ER2796_1879/1878 | 1894341..1893460   | nonsense                 | -                      | putative endopeptidase                                                                                                                  |
| rsmF        | b1835        | rsmF        | ER2796_1885/1886 | 1901988..1903427   | nonsense                 | -                      | 16S rRNA m(5)C1407 methyltransferase, SAM-dependent                                                                                     |
| dcm         | b1961        | dcm         | ER2796_2013/2012 | 2013306..2011888   | nonsense                 | -                      | DNA cytosine methyltransferase                                                                                                          |
| yedZ        | b1972        | yedZ        | ER2796_2025/2035 | 2021472..2031263   | Tn10 insertion           | ER2796_2026 to _2034   | inner membrane heme subunit for periplasmic YedYZ reductase                                                                             |
| hisG        | b2019        | hisG        | ER2796_2082      | 2080337..2081200   | deletion                 | -                      | ATP phosphoribosyltransferase                                                                                                           |
| rfdD        | b2040        | rfdD        | ER2796_2102/-    | 2102084..2101186   | frameshift               | -                      | dTDP-4-dehydrorhamnose reductase subunit, NAD(P)-binding, of dTDP-L-rhamnose synthase                                                   |
| mgIA        | b2149        | mgIA        | ER2796_2216/-    | 2230172..2227875   | IS1 insertion            | ER2796_2215            | fused methyl-galactoside transporter subunits of ABC superfamily: ATP-binding components                                                |
| rhmD        | b2247        | rhmD        | ER2796_2322/2321 | 2352296..2351092   | frameshift               | -                      | L-rhamnonate dehydratase                                                                                                                |
| eutA        | b2451        | eutA        | ER2796_2526      | 2550977..2549574   | deletion                 | -                      | reactivating factor for ethanolamine ammonia lyase                                                                                      |
| luxS        | b2687        | luxS        | ER2796_2763/2762 | 2798833..2798319   | frameshift               | -                      | S-ribosylhomocysteine lyase                                                                                                             |
| hycC        | b2723        | hycC        | ER2796_2803/2802 | 2833341..2831515   | nonsense                 | -                      | hydrogenase 3, membrane subunit                                                                                                         |
| rpoS        | b2741        | rpoS        | ER2796_-/2821    | 2851651..2850659   | nonsense                 | -                      | RNA polymerase, sigma S (sigma 38) factor                                                                                               |
| cptB        | b2897        | cptB        | ER2796_2983/-    | 3025170..3024904   | nonsense                 | -                      | antitoxin of CptAB toxin-antitoxin pair                                                                                                 |
| galP        | b2943        | galP        | ER2796_3029/3030 | 3072384..3073778   | nonsense                 | -                      | D-galactose transporter                                                                                                                 |
| ttdB        | b3062        | ttdB        | ER2796_3151/3152 | 3191471..3192075   | frameshift               | -                      | L-tartrate dehydratase, beta subunit                                                                                                    |
| tdcD        | b3115        | tdcD        | ER2796_3208/3206 | 3248958..3246551   | IS5 insertion            | ER2796_3207            | propionate kinase/acetate kinase C, anaerobic                                                                                           |
| argG        | b3172        | argG        | ER2796_3265/3266 | 3303935..3305277   | frameshift               | -                      | argininosuccinate synthetase                                                                                                            |
| dam         | b3387        | dam         | ER2796_-/3474    | 3485593..3484024   | deletion, KanR insertion | ER2796_3475            | DNA adenine methyltransferase                                                                                                           |
| xyIF        | b3566        | xyIF        | ER2796_3671/3673 | 3702011..3703780   | IS1 insertion            | ER2796_3672            | D-xylose transporter subunit                                                                                                            |
| mtIA        | b3599        | mtIA        | ER2796_3708/3709 | 3743938..3745849   | frameshift               | -                      | fused mannitol-specific PTS enzymes: IIA components/IIB components/IIC components                                                       |
| rph         | b3643        | rph         | ER2796_3754/-    | 3788205..3787518   | frameshift               | -                      | defective ribonuclease PH                                                                                                               |
| metB        | b3939        | metB        | ER2796_-/4061    | 4100328..4101486   | frameshift               | -                      | cystathionine gamma-synthase, PLP-dependent                                                                                             |
| opgB        | b4359        | opgB        | ER2796_4466      | 4516451..4514439   | deletion, IS10 insertion | -                      | phosphoglycerol transferases I and II                                                                                                   |

**Table S2B. List of ORFs with nonsynonymous changes from the reference strain MG1655 to ER2796 (ORFs with missense mutations).**

| MG1655 Gene | MG1655 Locus | ER2796 Gene | ER2796 Locus | Codon Change(s)        | Consequence(s) | MG1655 Functional Description                                                        |
|-------------|--------------|-------------|--------------|------------------------|----------------|--------------------------------------------------------------------------------------|
| rpsT        | b0023        | rpsT        | ER2796_18    | GCC -> GTC             | A11V           | 30S ribosomal subunit protein S20                                                    |
| ileS        | b0026        | ileS        | ER2796_20    | GAT -> AAT             | D510N          | isoleucyl-tRNA synthetase                                                            |
| yadV        | b0140        | yadV        | ER2796_137   | GTA -> GCA             | V45A           | putative periplasmic pilin chaperone                                                 |
| yafJ        | b0223        | yafJ        | ER2796_228   | GGC -> AGC             | G45S           | putative amidotransferase                                                            |
| ecpD        | b0290        | ecpD        | ER2796_297   | TCC -> TTT             | S202F          | putative receptor                                                                    |
| cynX        | b0341        | cynX        | ER2796_349   | GGC -> GAC             | G348D          | putative cyanate transporter                                                         |
| clpX        | b0438        | clpX        | ER2796_448   | GAT -> AAT             | D255N          | ATPase and specificity subunit of ClpX-ClpP ATP-dependent serine protease            |
| lon         | b0439        | lon         | ER2796_449   | TCT -> TTT             | S182F          | DNA-binding ATP-dependent protease La                                                |
| ylbA        | b0515        | ylbA        | ER2796_524   | TAA -> CAA             | stop262Q       | hypothetical protein                                                                 |
| entA        | b0596        | entA        | ER2796_607   | AAT -> GAT             | N7D            | 2,3-dihydro-2,3-dihydroxybenzoate dehydrogenase                                      |
| ybiT        | b0820        | ybiT        | ER2796_838   | CCT -> TCT; ACG -> AAG | P158S; T360K   | fused predicted transporter subunits of ABC superfamily: ATP-binding components      |
| rimK        | b0852        | rimK        | ER2796_870   | GAA -> AAA             | E178K          | ribosomal protein S6 modification protein                                            |
| rimC        | b0859        | rimC        | ER2796_878   | CGT -> CAT             | R143H          | 23S rRNA m(5)U747 methyltransferase, SAM-dependent                                   |
| rpsA        | b0911        | rpsA        | ER2796_932   | CGT -> TGT             | R171C          | 30S ribosomal subunit protein S1                                                     |
| smtA        | b0921        | smtA        | ER2796_942   | TCC -> TTC             | S14F           | putative S-adenosyl-L-methionine-dependent methyltransferase                         |
| uup         | b0949        | uup         | ER2796_972   | GAA -> AAA             | E553K          | fused predicted transporter subunits of ABC superfamily: ATP-binding components      |
| yceF        | b1087        | yceF        | ER2796_1115  | GTT -> TTT             | V173F          | Maf-like protein                                                                     |
| ptsG        | b1101        | ptsG        | ER2796_1130  | GTC -> TTC             | V12F           | fused glucose-specific PTS enzymes: IIB component/IIC component                      |
| ycfS        | b1113        | ycfS        | ER2796_1142  | CTG -> CCG             | L180P          | L,D-transpeptidase linking Lpp to murein                                             |
| icd         | b1136        | icd         | ER2796_1166  | GAT -> GAA             | D398E          | e14 prophage; isocitrate dehydrogenase, specific for NADP+                           |
| nhaB        | b1186        | nhaB        | ER2796_1197  | TCT -> TTT             | S350F          | sodium:proton antiporter                                                             |
| oppA        | b1243        | oppA        | ER2796_1262  | AAT -> TAT             | N271Y          | oligopeptide transporter subunit                                                     |
| oppF        | b1247        | oppF        | ER2796_1266  | TCC -> GCC             | S325A          | oligopeptide transporter subunit                                                     |
| yciB        | b1254        | yciB        | ER2796_1274  | GAG -> AAG             | E72K           | putative inner membrane protein                                                      |
| trpE        | b1264        | trpE        | ER2796_1284  | GGT -> GAT             | G454D          | component I of anthranilate synthase                                                 |
| acnA        | b1276        | acnA        | ER2796_1297  | AGC -> GGC             | S522G          | aconitate hydratase 1                                                                |
| gmr         | b1285        | gmr         | ER2796_1309  | GCT -> ACT             | A166T          | cyclic-di-GMP phosphodiesterase; csgD regulator; modulator of Rnase II stability     |
| sapA        | b1294        | sapA        | ER2796_1318  | CCC -> CTC             | P146L          | antimicrobial peptide transport ABC transporter periplasmic binding protein          |
| puuP        | b1296        | puuP        | ER2796_1320  | TAT -> TGT; GTA -> ATA | Y110C; V139I   | putrescine importer                                                                  |
| puuE        | b1302        | puuE        | ER2796_1328  | ACC -> ATC             | T73I           | GABA aminotransferase, PLP-dependent                                                 |
| pspF        | b1303        | pspF        | ER2796_1329  | TTG -> TTT             | L229F          | DNA-binding transcriptional activator                                                |
| ycjN        | b1310        | ycjN        | ER2796_1336  | TCA -> TTA             | S4L            | putative sugar transporter subunit: periplasmic-binding component of ABC superfamily |
| ycjP        | b1312        | ycjP        | ER2796_1338  | GGC -> TGC             | G137C          | putative sugar transporter subunit: membrane component of ABC superfamily            |
| stfR        | b1372        | stfR        | ER2796_1398  | CCG -> TCG             | P68S           | Rac prophage; predicted tail fiber protein                                           |
| hrpA        | b1413        | hrpA        | ER2796_1443  | CCA -> TCA             | P1081S         | putative ATP-dependent helicase                                                      |
| fdnH        | b1475        | fdnH        | ER2796_1510  | AAA -> ATA             | K177I          | formate dehydrogenase-N, Fe-S (beta) subunit, nitrate-inducible                      |
| adhP        | b1478        | adhP        | ER2796_1513  | GGT -> GTT             | G70V           | ethanol-active dehydrogenase/acetoldehyde-active reductase                           |
| lsrR        | b1512        | lsrR        | ER2796_1549  | GTG -> ATG             | V47M           | lsr operon transcriptional repressor                                                 |
| yneE        | b1520        | yneE        | ER2796_1557  | GAT -> GGT             | D298G          | putative inner membrane protein, bestrophin family                                   |
| ydfK        | b1544        | ydfK        | ER2796_1584  | AAA -> ACA             | K51T           | cold shock protein, function unknown, Qin prophage                                   |
| ydfU        | b1560        | ydfU        | ER2796_1601  | CTG -> CAG             | L209Q          | Qin prophage; putative protein                                                       |
| ydfC        | b1573        | ydfC        | ER2796_1610  | TCC -> TTC             | S47F           | conserved protein, Qin prophage                                                      |
| ydfD        | b1576        | ydfD        | ER2796_1613  | CCG -> TCG             | P60S           | Qin prophage; putative protein                                                       |
| asr         | b1597        | asr         | ER2796_1634  | ACC -> ATC             | T26I           | acid shock-inducible periplasmic protein                                             |
| ydgC        | b1607        | ydgC        | ER2796_1643  | CTT -> TTT             | L40F           | inner membrane protein, GlpM family                                                  |
| ydiJ        | b1687        | ydiJ        | ER2796_1729  | CGC -> TGC             | R693C          | putative FAD-linked oxidoreductase                                                   |
| ydiY        | b1722        | ydiY        | ER2796_1766  | TTG -> TCG             | L4S            | putative outer membrane protein, acid-inducible                                      |
| yoaA        | b1808        | yoaA        | ER2796_1855  | GGC -> AGC             | G120S          | conserved protein with nucleoside triphosphate hydrolase domain                      |
| pabB        | b1812        | pabB        | ER2796_1860  | CTC -> CCC             | L12P           | aminodeoxychorismate synthase, subunit I                                             |
| ftnB        | b1902        | ftnB        | ER2796_1953  | GCC -> GTC             | A45V           | ferritin B, probable ferrous iron reservoir                                          |
| yedY        | b1971        | yedY        | ER2796_2024  | GCC -> GAC             | A319D          | membrane-anchored, periplasmic TMAO, DMSO reductase                                  |

|      |       |      |             |                        |              |                                                                                                                  |
|------|-------|------|-------------|------------------------|--------------|------------------------------------------------------------------------------------------------------------------|
| ugd  | b2028 | ugd  | ER2796_2091 | ATT -> AAT             | I30N         | UDP-glucose 6-dehydrogenase                                                                                      |
| yegH | b2063 | yegH | ER2796_2125 | GAA -> AAA             | E364K        | inner membrane protein                                                                                           |
| mglC | b2148 | mglC | ER2796_2214 | CCG -> ACG             | P217T        | methyl-galactoside transporter subunit                                                                           |
| setB | b2170 | setB | ER2796_2240 | GAG -> ATG             | E200M        | lactose/glucose efflux system                                                                                    |
| napB | b2203 | napB | ER2796_2274 | TTT -> TAT             | F141Y        | nitrate reductase, small, cytochrome C550 subunit, periplasmic                                                   |
| rcsC | b2218 | rcsC | ER2796_2290 | GAT -> TAT             | D267Y        | hybrid sensory kinase in two-component regulatory system with RcsB and YojN                                      |
| nuoM | b2277 | nuoM | ER2796_2353 | GGT -> GCT             | G270A        | NADH:ubiquinone oxidoreductase, membrane subunit M                                                               |
| hisP | b2306 | hisP | ER2796_2383 | GTA -> ATA             | V207I        | histidine/lysine/arginine/ornithine transporter subunit                                                          |
| mnmC | b2324 | mnmC | ER2796_2403 | GCG -> ACG             | A562T        | fused 5-methylaminomethyl-2-thiouridine-forming enzyme methyltransferase and FAD-dependent demodification enzyme |
| smrB | b2331 | smrB | ER2796_2410 | ATG -> ATA             | M153I        | putative DNA endonuclease                                                                                        |
| yfeO | b2389 | yfeO | ER2796_2471 | CCG -> CTG             | P327L        | putative ion channel protein                                                                                     |
| narQ | b2469 | narQ | ER2796_2544 | GCA -> GTA             | A461V        | sensory histidine kinase in two-component regulatory system with NarP (NarL)                                     |
| yfgI | b2506 | yfgI | ER2796_2584 | AGC -> AAC             | S176N        | hypothetical protein                                                                                             |
| nrdF | b2676 | nrdF | ER2796_2749 | TCT -> TTT             | S211F        | ribonucleoside-diphosphate reductase 2, beta subunit, ferritin-like protein                                      |
| truD | b2745 | truD | ER2796_2826 | AAC -> ACC             | N51T         | tRNA(Glu) pseudouridine(13) synthase                                                                             |
| pyrG | b2780 | pyrG | ER2796_2865 | TCT -> TTT             | S237F        | CTP synthetase                                                                                                   |
| ygdH | b2795 | ygdH | ER2796_2882 | CCC -> CTT             | P79L         | conserved protein, UPF0717 family                                                                                |
| araE | b2841 | araE | ER2796_2930 | GGG -> AGG             | G87R         | arabinose transporter                                                                                            |
| yqeF | b2844 | yqeF | ER2796_2933 | TCC -> TTC             | S25F         | putative acyltransferase                                                                                         |
| ygeH | b2852 | ygeH | ER2796_2941 | CTC -> TTC             | L374F        | predictedtranscriptional regulator                                                                               |
| ftsP | b3017 | ftsP | ER2796_3108 | CGC -> TGC             | R352C        | septal ring component that protects the divisome from stress; multicopy suppressor of fts(Ts)                    |
| agal | b3141 | agal | ER2796_3234 | CCA -> TCA             | P96S         | galactosamine-6-phosphate isomerase                                                                              |
| dacB | b3182 | dacB | ER2796_3276 | GAT -> TAT             | D261Y        | D-alanyl-D-alanine carboxypeptidase                                                                              |
| aaeB | b3240 | aaeB | ER2796_3325 | ACG -> CCG             | T50P         | p-hydroxybenzoic acid efflux system component                                                                    |
| secY | b3300 | secY | ER2796_3386 | CCG -> TCG; GCC -> GTC | P40S; A46V   | preprotein translocase membrane subunit                                                                          |
| rplD | b3319 | rplD | ER2796_3405 | CCG -> TCG             | P89S         | 50S ribosomal subunit protein L4                                                                                 |
| rpsL | b3342 | rpsL | ER2796_3428 | AAA -> ACA; AAA -> CAA | K43T; K88Q   | 30S ribosomal subunit protein S12                                                                                |
| yhfK | b3358 | yhfK | ER2796_3445 | GCA -> ACA             | A656T        | conserved inner membrane protein                                                                                 |
| malT | b3418 | malT | ER2796_3508 | GTC -> CTC             | V655L        | DNA-binding transcriptional activator for the mal regulon and maltotriose-ATP-binding protein                    |
| nikD | b3479 | nikD | ER2796_3570 | ATA -> AAA             | I122K        | nickel transporter subunit                                                                                       |
| yhhI | b3484 | yhhI | ER2796_3574 | GAT -> GAA             | D56E         | putative transposase                                                                                             |
| yhiJ | b3488 | yhiJ | ER2796_3579 | AAT -> CTT             | N412L        | hypothetical protein                                                                                             |
| gor  | b3500 | gor  | ER2796_3593 | GCG -> GTG             | A377V        | glutathione oxidoreductase                                                                                       |
| glyQ | b3560 | glyQ | ER2796_3664 | GAG -> GCG             | E48A         | glycine tRNA synthetase, alpha subunit                                                                           |
| xylB | b3564 | xylB | ER2796_3669 | GCG -> GTG             | A295V        | xylulokinase                                                                                                     |
| xylA | b3565 | xylA | ER2796_3670 | CAC -> TAC             | H271Y        | D-xylose isomerase                                                                                               |
| yiaQ | b3581 | yiaQ | ER2796_3688 | GCT -> ACT             | A68T         | 3-keto-L-gulonate 6-phosphate decarboxylase                                                                      |
| secB | b3609 | secB | ER2796_3720 | TCC -> TTC             | S49F         | protein export chaperone                                                                                         |
| waaY | b3625 | waaY | ER2796_3736 | GAC -> AAC             | D27N         | lipopolysaccharide core biosynthesis protein                                                                     |
| yidE | b3685 | yidE | ER2796_3797 | GTT -> GCT             | V130A        | putative transporter                                                                                             |
| yieK | b3718 | yieK | ER2796_3830 | GAA -> AAA             | E67K         | putative 6-phosphogluconolactonase                                                                               |
| rbsC | b3750 | rbsC | ER2796_3863 | GTC -> CTC             | V305L        | D-ribose transporter subunit                                                                                     |
| rep  | b3778 | rep  | ER2796_3888 | GGC -> GTC             | G329V        | DNA helicase and single-stranded DNA-dependent ATPase                                                            |
| rhlB | b3780 | rhlB | ER2796_3890 | CAC -> TAC             | H153Y        | ATP-dependent RNA helicase                                                                                       |
| wecA | b3784 | wecA | ER2796_3895 | ATG -> ATA             | M256I        | UDP-GlcNAc:undecaprenylphosphate GlcNAc-1-phosphate transferase                                                  |
| wzzE | b3785 | wzzE | ER2796_3896 | TCG -> CCG             | S240P        | Entobacterial Common Antigen (ECA) polysaccharide chain length modulation protein                                |
| yjcO | b4078 | yjcO | ER2796_4217 | GCC -> GTC             | A54V         | hypothetical protein                                                                                             |
| rrn  | b4179 | rrn  | ER2796_4325 | GAT -> AAT; GTG -> CTG | D225N; V354L | exoribonuclease R, RNase R                                                                                       |
| ppa  | b4226 | ppa  | ER2796_4371 | CCG -> TCG             | P23S         | inorganic pyrophosphatase                                                                                        |
| treR | b4241 | treR | ER2796_4386 | ACC -> ATC             | T234I        | DNA-binding transcriptional repressor                                                                            |
| bdcA | b4249 | bdcA | ER2796_4392 | GGA -> AGA             | G52R         | c-di-GMP-binding biofilm dispersal mediator protein                                                              |
| idnO | b4266 | idnO | ER2796_4409 | GGC -> GAC             | G85D         | 5-keto-D-gluconate-5-reductase                                                                                   |
| yjjU | b4377 | yjjU | ER2796_4486 | CGG -> CAG             | R126Q        | putative phospholipase, patatin-like family                                                                      |
| deoA | b4382 | deoA | ER2796_4493 | CCG -> TCG             | P110S        | thymidine phosphorylase                                                                                          |
| yjjJ | b4385 | yjjJ | ER2796_4496 | CTC -> TTC             | L182F        | putative protein kinase                                                                                          |

|      |       |      |             |            |        |                                                                                                                                                                                          |
|------|-------|------|-------------|------------|--------|------------------------------------------------------------------------------------------------------------------------------------------------------------------------------------------|
| creC | b4399 | creC | ER2796_4511 | CGC -> CCC | R77P   | sensory histidine kinase in two-component regulatory system with CreB or PhoB, regulator of the CreBC regulon<br>conserved membrane protein, predicted transporter<br>IS1 repressor TnpA |
| yhdP | b4472 | yhdP | ER2796_3330 | CCG -> TCG | P1247S |                                                                                                                                                                                          |
| insA | b4516 | insA | ER2796_4627 | TCA -> TTA | S87L   |                                                                                                                                                                                          |
