# Supplementary material for: Complete Genome Sequence of ER2796, a DNA Methyltransferase-Deficient Strain of Escherichia coli K-12
Source: PubMed Central journal article supplement (PMC4444293; doi:10.1371/journal.pone.0127446), 2015-05-26
Supplement: pone.0127446.s004.pdf [file pone.0127446.s004.pdf]

**Table 3. List of additional sequence changes from the reference strain MG1655 to ER3413 over and above those in ER2796. [a]**

| Type               | MG1655 Location     | ER2796 Location     | Change   | Gene | Locus | Codon Change | Type       | AA Change | ER2796 ORF  | Footnotes |
|--------------------|---------------------|---------------------|----------|------|-------|--------------|------------|-----------|-------------|-----------|
| SNP (transition)   | 98387               | 98387               | C -> T   | murD | b0088 | GCG -> GTG   | MISSENSE   | A434V     | ER2796_0085 |           |
| SNP (transition)   | 271112              | 272448              | A -> G   | -    | -     | -            | INTERGENIC | -         | -           |           |
| SNP (transition)   | 1110582             | 1108371             | C -> T   | opgH | b1049 | GCG -> GTG   | MISSENSE   | A166V     | ER2796_1076 |           |
| SNP (transition)   | -                   | 1617874             | C -> T   | -    | -     | GTT -> ATT   | MISSENSE   | V266I     | ER2796_1591 | b         |
| SNP (transition)   | -                   | 1618352             | T -> C   | -    | -     | CGA -> CGG   | SILENT     | R106      | ER2796_1591 | b         |
| SNP (transition)   | -                   | 1618367             | A -> G   | -    | -     | ATT -> ATC   | SILENT     | I101      | ER2796_1591 | b         |
| SNP (transversion) | -                   | 1618574             | T -> G   | -    | -     | GCA -> GCC   | SILENT     | A32       | ER2796_1591 | b         |
| SNP (transition)   | -                   | 1618670             | C -> T   | -    | -     | -            | INTERGENIC | -         | -           | b         |
| SNP (transversion) | -                   | 1618694             | C -> G   | -    | -     | -            | INTERGENIC | -         | -           | b         |
| SNP (transition)   | -                   | 1618730             | C -> T   | -    | -     | -            | INTERGENIC | -         | -           | b         |
| SNP (transversion) | -                   | 1618750             | T -> G   | -    | -     | -            | INTERGENIC | -         | -           | b         |
| Substitution       | -                   | 1618752             | CC -> TA | -    | -     | -            | INTERGENIC | -         | -           | b         |
| SNP (transition)   | 1913499             | 1897240             | A -> G   | proQ | b1831 | CGT -> CGC   | SILENT     | R20       | ER2796_1881 |           |
| SNP (transition)   | 3325707             | 3312982             | A -> G   | -    | -     | -            | INTERGENIC | -         | -           |           |
| insertion          | bet 3410356-3410357 | bet 3381281-3381282 | ins CCGG | yhdJ | b3262 | -            | FRAMESHIFT | -         | ER2796_3347 | c         |
| insertion          | -                   | 3485404             | ins C    | -    | -     | -            | INTERGENIC | -         | -           | d         |
| SNP (transition)   | 3766440             | 3740074             | T -> C   | yibG | b3596 | TTG -> CTG   | SILENT     | L81       | ER2796_4597 |           |
| SNP (transition)   | 4245102             | 4219422             | G -> A   | malK | b4035 | GGC -> GAC   | MISSENSE   | G99D      | ER2796_4167 |           |

**Footnotes**

- a Six changes to MG1655 in ER2796 are not present in ER3413; these are noted in Table S1.  
b Probable gene conversion event in IS10 insertion  
c Engineered disruption  
d Within the insertion at dam, but outside the aph ORF
